# Supplementary material for: Distinguishing Parkinson’s Disease with GLCM Features from the Hankelization of EEG Signals
Source: MDPI journal article supplement (doi:10.3390/diagnostics13101769), 2023-05-17
Supplement: s1 [file s1]

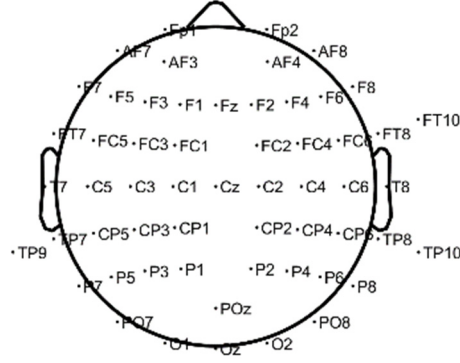

**Figure S1.** Common Electrode Locations.

**Table S1.** Common Channel Names List

{'AF3','AF4','AF7','AF8','C1','C2','C3','C4','C5','C6','CP1','CP2','CP3','CP4','CP5','CP6','Cz','F1','F2','F3','F4','F5','F6','F7','F8','FC1','FC2','FC3','FC4','FC5','FC6','Fp1','Fp2','FT10','FT7','FT8','Fz','O1','O2','Oz','P1','P2','P3','P4','P5','P6','P7','P8','PO7','PO8','POz','T7','T8','TP10','TP7','TP8','TP9'}

**Table S2.** Notations to compute Haralick Texture Features

| Notation     | Definition                                          |
|--------------|-----------------------------------------------------|
| $x(i, j)$    | Element $i, j$ in the unnormalized GLCM             |
| $N$          | Number of gray-levels                               |
| $P(i, j)$    | $\frac{x(i, j)}{\sum_{i=1}^N \sum_{j=1}^N x(i, j)}$ |
| $P_x(i)$     | $\sum_{j=1}^N P(i, j)$                              |
| $P_y(j)$     | $\sum_{i=1}^N P(i, j)$                              |
| $\mu_x$      | $\sum_{i=1}^N iP_x(i)$                              |
| $\mu_y$      | $\sum_{j=1}^N jP_y(j)$                              |
| $\mu$        | For symmetric GLCM $\mu_x = \mu_y = \mu$            |
| $\sigma_x^2$ | $\sum_{i=1}^N (i - \mu_x)^2 P_x^2(i)$               |
| $\sigma_y^2$ | $\sum_{j=1}^N (j - \mu_y)^2 P_y^2(j)$               |
| $P_{x+y}(k)$ | $\sum_{i=1}^N \sum_{j=1}^N P(i, j), i + j = k$      |

|              |                                                                |
|--------------|----------------------------------------------------------------|
| $P_{x-y}(k)$ | $\sum_{i=1}^N \sum_{j=1}^N P(i, j),  i - j  = k$               |
| $\mu_{x+y}$  | $\sum_{k=2}^{2N} k P_{x+y}(k)$                                 |
| $\mu_{x-y}$  | $\sum_{k=0}^{N-1} k P_{x-y}(k)$                                |
| $HX$         | $-\sum_{i=1}^N P_x(i) \log(P_x(i))$                            |
| $HY$         | $-\sum_{i=1}^N P_y(i) \log(P_y(i))$                            |
| $HXY$        | $-\sum_{i=1}^N \sum_{j=1}^N P(i, j) \log(P(i, j))$             |
| $HXY1$       | $-\sum_{i=1}^N \sum_{j=1}^N P(i, j) \log[P_x(i) P_y(j)]$       |
| $HXY2$       | $-\sum_{i=1}^N \sum_{j=1}^N P_x(i) P_y(j) \log[P_x(i) P_y(j)]$ |

**Table S3.** GLCM Texture Features

| Feature                 | Expression                                                                                                                     |
|-------------------------|--------------------------------------------------------------------------------------------------------------------------------|
| Autocorrelation [1]     | $AUTO C = \sum_{i=1}^N \sum_{j=1}^N (i \times j) P(i, j)$                                                                      |
| Cluster Prominence [2]  | $PROM = \sum_{i=1}^N \sum_{j=1}^N \{i + j - 2\mu\}^3 P(i, j)$                                                                  |
| Cluster Shade [2]       | $SHADE = \sum_{i=1}^N \sum_{j=1}^N \{i + j - 2\mu\}^4 P(i, j)$                                                                 |
| Contrast [2]            | $CONTRAST = \sum_{i=1}^N \sum_{i=1}^N (i - j)^2 P(i, j)$                                                                       |
| Correlation [2]         | $CORR = \sum_{i=1}^N \sum_{j=1}^N \left( \frac{i - \mu_x}{\sigma_x} \right) \left( \frac{j - \mu_y}{\sigma_y} \right) P(i, j)$ |
| Difference entropy [2]  | $DENT = - \sum_{k=0}^{N-1} P_{x-y}(k) \log(P_{x-y}(k))$                                                                        |
| Difference variance [2] | $DVAR = \sum_{k=0}^{N-1} (k - \mu_{x-y})^2 P_{x-y}(k)$                                                                         |
| Dissimilarity [1]       | $DISSIMILARITY = \sum_{i=1}^N \sum_{j=1}^N  i - j  P(i, j)$                                                                    |
| Energy [2]              | $ENR = \sum_{i=1}^N \sum_{i=1}^N P(i, j)^2$                                                                                    |
| Entropy [2]             | $ENT = - \sum_{i=1}^N \sum_{j=1}^N P(i, j) \times \log(P(i, j))$                                                               |

---

|                                           |                                                              |
|-------------------------------------------|--------------------------------------------------------------|
| Homogeneity [1]                           | $HOM = \sum_{i=1}^N \sum_{j=1}^N \frac{P(i,j)}{1 + (i-j)^2}$ |
| Informational measure of correlation1 [2] | $IMC1 = \frac{HXY - HXY1}{\max(HX, HY)}$                     |
| Informational measure of correlation2 [2] | $IMC2 = \sqrt{1 - \exp(-2(HXY2 - HXY))}$                     |
| Inverse difference [3]                    | $IDM = \sum_{i=1}^N \sum_{j=1}^N \frac{P(i,j)}{1 +  i-j }$   |
| Maximum probability [1]                   | $PROB = \max_{i,j} (P(i,j))$                                 |
| Sum average [2]                           | $SAVG = \sum_{k=2}^{2N} kP_{x+y}(k)$                         |
| Sum entropy [2]                           | $SENT = - \sum_{k=2}^{2N} P_{x+y}(k) \log(P_{x+y}(k))$       |
| Sum of squares: Variance[2]               | $SQVAR = \sum_{i=1}^N \sum_{j=1}^N (k - \mu)^2 P(i,j)$       |
| Sum variance[2]                           | $SVAR = \sum_{k=2}^{2N} (k - \mu_{x+y})^2 P_{x+y}(k)$        |

---

1. Soh, L-K, and Costas Tsatsoulis. "Texture Analysis of Sar Sea Ice Imagery Using Gray Level Co-Occurrence Matrices." *IEEE Transactions on geoscience and remote sensing* 37, no. 2 (1999): 780-95.
2. Haralick, Robert M, Karthikeyan Shanmugam, and Its' Hak Dinstein. "Textural Features for Image Classification." *IEEE Transactions on systems, man, and cybernetics*, no. 6 (1973): 610-21.
3. Clausi, David A. "An Analysis of Co-Occurrence Texture Statistics as a Function of Grey Level Quantization." *Canadian Journal of remote sensing* 28, no. 1 (2002): 45-62.
